# Supplementary material for: Differences in food consumption between patients with Hashimoto’s thyroiditis and healthy individuals
Source: PubMed Central journal article supplement (PMC7327046; doi:10.1038/s41598-020-67719-7), 2020-06-30
Supplement: 41598_2020_67719_MOESM1_ESM.pdf [file 41598_2020_67719_MOESM1_ESM.pdf]

# Differences in food consumption between patients with Hashimoto's thyroiditis and healthy individuals

Dean Kaličanin<sup>1</sup>, Luka Brčić<sup>1</sup>, Katija Ljubetić<sup>2</sup>, Ana Barić<sup>3</sup>, Sanda Gračan<sup>3</sup>, Marko Brekalo<sup>3</sup>, Vesela Torlak Lovrić<sup>3</sup>, Ivana Kolčić<sup>4</sup>, Ozren Polašek<sup>4</sup>, Tatijana Zemunik<sup>1</sup>, Ante Punda<sup>3</sup>, Vesna Boraska Perica<sup>1\*</sup>

<sup>1</sup>University of Split, School of Medicine, Department of Medical Biology, 21000 Split, Croatia

<sup>2</sup>University of Rijeka, Faculty of Health Studies, Department of Clinical Nutrition, 51000 Rijeka

<sup>3</sup>University Hospital Split, Department of Nuclear Medicine, 21000 Split, Croatia

<sup>4</sup>University of Split, School of Medicine, Department of Public Health, 21000 Split, Croatia

**Corresponding author:** Vesna Boraska Perica, Assoc. Prof, University of Split, School of Medicine, Soltanska 2, 21 000 Split, Croatia

Phone: +385 21 557 873

E-mail: [yboraska@mefst.hr](mailto:yboraska@mefst.hr)

Supplementary Table 1. The list of 22 food groups formed from 48 food items from FFQ

**MILK and MILK PRODUCTS:** Milk, Yoghurt, Sour cream, Cottage cheese, Melted cheese, Hard cheese

**RED MEAT:** Pork, Veal, Beef, Lamb, Internal organs – liver, brains, lungs, etc.

**PROCESSED MEAT:** Bacon, Sausages, Salami

**WHITE MEAT:** Chicken, Turkey

**WHITE FISH:** White fish

**OILY FISH:** Big and small (salted pilchard) oily fish

**SEA FOOD:** Sea-food (shells, crab), Squid and Octopus

**VEGETABLES:** Leafy vegetables (cabbage, kale), Root vegetables (carrot, beet root), Flower vegetables (broccoli), Fruity vegetables (tomato), Legumes, Canned and pickled vegetables

**EGGS:** Eggs

**POTATO:** Potato

**FRUITS:** Fresh fruits, Dried fruit

**NUTS:** Nuts

**REFINED GRAINS:** White bread, Macaroni or Rice

**WHOLE GRAINS:** Whole grain bread

**SWEETS:** Cakes, Chocolate, Cookies, Bonbons

**JAM, MARMALADE:** Jam and Marmelade

**NON-ALCOHOLIC BEVERAGES:** Cedevita (fruity flavoured vitamin instant drink), Soda

**LIQUOR:** Liquor

**COFFEE and TEA:** Coffee, Tea

**PLANT OIL:** Plant oil

**OLIVE OIL:** Olive oil

**ANIMAL FAT:** Animal fat

Supplementary Table 2. Calculation of weekly intake of food items for each frequency category from FFQ

| Frequency categories | HT cases      | Controls |
|----------------------|---------------|----------|
|                      | Weekly intake |          |
| Every day            | 7             | 7        |
| 2-3 times a week     | 2.5           | 2.5      |
| Once a week          | 1             | 1        |
| Once a month         | 0.25          | na       |
| Rarely               | 0.125*        | 0.167**  |
| Never                | 0             | 0        |
| Always               |               | 7        |
| Sometimes            |               | 1        |
| Never                |               | 0        |

\*once in two months; \*\*once in 6 weeks

Supplementary Table 3. Calculation of physical activity in HT patients

|                   | Physical activity score during every day's work |                  |             |              |
|-------------------|-------------------------------------------------|------------------|-------------|--------------|
|                   | Sitting                                         | Light            | Moderate    | Hard         |
|                   | 0                                               | 30               | 60          | 120          |
|                   | Score of engagement in any sport activity       |                  |             |              |
|                   | Daily                                           | 2-3 times a week | Once a week | Occasionally |
| Less than an hour | 30                                              | 10               | 4           | 1            |
| Between 1-2 hours | 45                                              | 15               | 6           | 1.5          |
| Over 2 hours      | 60                                              | 20               | 8           | 2            |

Physical activity was assessed during the every day's work (with four responses: sitting, light, moderate and hard)

and engagement in any sport activity (with four responses occasionally, once a week, 2-3 times a week and daily).

Physical activity was calculated as a sum of physical activity score during every day's work and score of engagement in any sport activity for each HT patient.

Supplementary Table 4. Comparison of weekly intake frequency for 22 food groups between HT cases and controls

| Food groups                                                  | Mean (SD)*<br>HT cases | Mean (SD)<br>controls | OR (95% CI)**     | P value           |
|--------------------------------------------------------------|------------------------|-----------------------|-------------------|-------------------|
| <b>More frequently consumed in HT cases than in controls</b> |                        |                       |                   |                   |
| <b>ANIMAL FAT</b>                                            | 0.9 (1.5)              | 0.5 (1.2)             | 1.55 (1.30-1.86)  | <b>&lt;0.0001</b> |
| <b>PROCESSED MEAT</b>                                        | 2.4 (2.4)              | 2.1 (2.5)             | 1.16 (1.06-1.27)  | <b>0.0012</b>     |
| <b>NUTS</b>                                                  | 1.5 (1.9)              | 1.2 (1.7)             | 1.23 (1.08-1.40)  | <b>0.0015</b>     |
| POTATOES                                                     | 2.9 (2.1)              | 2.8 (2.0)             | 1.11 (1.00-1.23)  | 0.0545            |
| JAM, MARMALADE                                               | 1.1 (1.6)              | 1.1 (1.7)             | 1.08 (0.96-1.21)  | 0.2252            |
| EGGS                                                         | 1.6 (1.3)              | 1.2 (1.2)             | 1.08 (0.92-1.27)  | 0.3724            |
| SWEETS                                                       | 5.9 (5.3)              | 5.6 (5.3)             | 1.001 (0.96-1.04) | 0.9576            |
| <b>Less frequently consumed in HT cases than in controls</b> |                        |                       |                   |                   |
| <b>RED MEAT</b>                                              | 2.5 (2.0)              | 3.5 (2.6)             | 0.80 (0.72-0.89)  | <b>&lt;0.0001</b> |
| <b>NON-ALCOHOLIC BEVERAGES</b>                               | 1.5 (2.3)              | 2.4 (2.9)             | 0.82 (0.75-0.89)  | <b>&lt;0.0001</b> |
| <b>WHOLE GRAINS</b>                                          | 1.8 (2.2)              | 2.8 (2.8)             | 0.82 (0.76-0.89)  | <b>&lt;0.0001</b> |
| <b>PLANT OIL</b>                                             | 3.8 (3.1)              | 4.7 (3.0)             | 0.87 (0.82-0.93)  | <b>&lt;0.0001</b> |
| <b>OLIVE OIL</b>                                             | 3.6 (3.0)              | 4.6 (3.0)             | 0.90 (0.84-0.96)  | <b>0.0018</b>     |
| <b>LIQUOR</b>                                                | 0.1 (0.3)              | 0.3 (0.9)             | 0.49 (0.29-0.84)  | <b>0.0087</b>     |
| <b>OILY FISH</b>                                             | 0.8 (0.9)              | 1.2 (1.1)             | 0.72 (0.54-0.96)  | <b>0.0245</b>     |
| <b>FRUITS</b>                                                | 5.2 (3.2)              | 5.6 (3.1)             | 0.93 (0.87-0.996) | <b>0.0389</b>     |
| REFINED GRAINS                                               | 6.2 (3.7)              | 6.5 (3.5)             | 0.96 (0.90-1.02)  | 0.1437            |
| MILK and MILK PRODUCTS                                       | 10.1 (5.6)             | 11.0 (6.0)            | 0.98 (0.95-1.02)  | 0.3077            |
| COFFEE and TEA                                               | 7.9 (3.9)              | 8.4 (3.9)             | 0.98 (0.93-1.03)  | 0.4120            |
| WHITE FISH                                                   | 0.7 (0.9)              | 1.0 (1.0)             | 0.91 (0.69-1.20)  | 0.4946            |
| VEGETABLES                                                   | 9.8 (6.1)              | 10.8 (6.2)            | 0.99 (0.96-1.03)  | 0.6614            |
| WHITE MEAT                                                   | 2.8 (1.9)              | 2.8 (2.0)             | 0.99 (0.89-1.09)  | 0.7794            |
| SEAFOOD                                                      | 0.6 (1.1)              | 0.8 (1.1)             | 0.99 (0.77-1.29)  | 0.9660            |

Food groups are ordered from the lowest to the highest  $p$  value. Food groups with the same  $p$  value (<0.0001) are ordered from the lowest to the highest OR.  $p$  <0.05 are shown in bold.

\*SD- standard deviation, \*\*OR (95% CI)- odds ratio with 95% confidence interval

Supplementary Table 5. Comparison of weekly intake of 22 food groups between 177 HT patients who were on LT4 therapy and 289 HT patients without LT4 therapy

| Food groups             | Mean (SD)* HT patients on therapy | Mean (SD) HT patients without therapy | OR (95% CI)*      | P value      |
|-------------------------|-----------------------------------|---------------------------------------|-------------------|--------------|
| <b>RED MEAT</b>         | 2.9 (2.2)                         | 2.3 (1.9)                             | 1.24 (1.08-1.43)  | <b>0.003</b> |
| LIQUOR                  | 0.2 (0.3)                         | 0.1 (0.2)                             | 2.14 (0.96-4.79)  | 0.065        |
| NON-ALCOHOLIC BEVERAGES | 1.7 (2.6)                         | 1.3 (2.0)                             | 1.10 (0.98-1.22)  | 0.110        |
| ANIMAL FAT              | 1.1 (1.8)                         | 0.8 (1.2)                             | 1.11 (0.95-1.30)  | 0.173        |
| OLIVE OIL               | 3.9 (3.1)                         | 3.4 (3.0)                             | 1.06 (0.97-1.14)  | 0.196        |
| COFFEE and TEA          | 7.9 (3.8)                         | 8.1 (4.1)                             | 0.97 (0.91-1.03)  | 0.282        |
| WHOLE GRAINS            | 1.9 (2.3)                         | 1.7 (2.2)                             | 1.06 (0.95-1.17)  | 0.287        |
| PROCESEED MEAT          | 2.4 (2.4)                         | 2.4 (2.3)                             | 0.95 (0.86-1.06)  | 0.374        |
| FRUITS                  | 5.3 (3.3)                         | 5.1 (3.1)                             | 1.03 (0.95-1.11)  | 0.481        |
| VEGETABLES              | 9.9 (6.2)                         | 9.9 (6.2)                             | 0.99 (0.95-1.03)  | 0.510        |
| SWEETS                  | 5.7 (5.2)                         | 6.1 (5.4)                             | 0.99 (0.94-1.03)  | 0.530        |
| WHITE MEAT              | 2.8 (2.1)                         | 2.8 (1.9)                             | 1.04 (0.92-1.16)  | 0.558        |
| JAM, MARMALADE          | 1.2 (1.8)                         | 1.1 (1.6)                             | 0.96 (0.84-1.11)  | 0.617        |
| EGGS                    | 1.6 (1.3)                         | 1.6 (1.3)                             | 1.04 (0.87-1.24)  | 0.653        |
| WHITEFISH               | 0.8 (0.8)                         | 0.7 (0.9)                             | 1.08 (0.76-1.53)  | 0.667        |
| PLANT OIL               | 3.8 (3.1)                         | 3.9 (3.1)                             | 1.01 (0.94-1.09)  | 0.748        |
| POTATOES                | 3.0 (2.2)                         | 2.9 (2.1)                             | 0.98 (0.87-1.11)  | 0.757        |
| SEAFOOD                 | 0.6 (1.3)                         | 0.6 (1.1)                             | 1.05 (0.75-1.46)  | 0.778        |
| OILY FISH               | 0.8 (1.1)                         | 0.7 (0.7)                             | 0.96 (0.65-1.43)  | 0.850        |
| MILK and MILK PRODUCTS  | 10 (5.1)                          | 10.3 (5.9)                            | 0.998 (0.96-1.04) | 0.916        |
| REFINED GRAINS          | 6.3 (3.7)                         | 6.2 (3.6)                             | 1.002 (0.94-1.07) | 0.961        |
| NUTS                    | 1.5 (2.0)                         | 1.5 (1.9)                             | 1.00 (0.87-1.15)  | 0.999        |

Information on LT4 therapy was not available for 25 HT patients. We used logistic regression model, where therapy status (with/without LT4 therapy) was used as dependent variable and 22 food groups as independent variables along with age and gender.

P <0.05 are shown in bold. LT4 - levothyroxine, SD\*- standard deviation, OR (95% CI)\* - odds ratio with 95% confidence interval

Supplementary Table 6. Association of weekly intake of 22 food groups with HT-related quantitative traits in HT patients

| Phenotype<br>Food groups | TSH     |       |         |         |       |         |         |       |         |
|--------------------------|---------|-------|---------|---------|-------|---------|---------|-------|---------|
|                          | ALL     |       |         | OT      |       |         | NT      |       |         |
|                          | $\beta$ | SE    | P value | $\beta$ | SE    | P value | $\beta$ | SE    | P value |
| MILK and MILK PRODUCTS   | 0.002   | 0.010 | 0.8170  | 0.014   | 0.019 | 0.4570  | -0.010  | 0.013 | 0.4500  |
| RED MEAT                 | -0.027  | 0.034 | 0.4220  | -0.009  | 0.052 | 0.8630  | -0.014  | 0.049 | 0.7680  |
| PROCESEED MEAT           | 0.000   | 0.025 | 0.9850  | 0.002   | 0.047 | 0.9620  | -0.013  | 0.034 | 0.7110  |
| WHITE MEAT               | -0.006  | 0.031 | 0.8560  | 0.027   | 0.045 | 0.5510  | -0.055  | 0.047 | 0.2480  |
| WHITEFISH                | -0.035  | 0.085 | 0.6760  | 0.029   | 0.151 | 0.8480  | -0.002  | 0.112 | 0.9880  |
| OILY FISH                | -0.072  | 0.094 | 0.4460  | -0.085  | 0.141 | 0.5450  | -0.121  | 0.141 | 0.3910  |
| SEAFOOD                  | 0.062   | 0.073 | 0.3950  | -0.023  | 0.106 | 0.8270  | 0.185   | 0.136 | 0.1750  |
| VEGETABLES               | 0.012   | 0.010 | 0.2090  | 0.008   | 0.016 | 0.6290  | 0.008   | 0.013 | 0.5400  |
| EGGS                     | 0.032   | 0.041 | 0.4390  | 0.046   | 0.069 | 0.5040  | -0.002  | 0.056 | 0.9780  |
| POTATOES                 | 0.006   | 0.030 | 0.8340  | 0.006   | 0.047 | 0.9040  | 0.033   | 0.041 | 0.4270  |
| FRUITS                   | 0.012   | 0.019 | 0.5270  | 0.029   | 0.027 | 0.3020  | 0.004   | 0.027 | 0.8770  |
| NUTS                     | -0.046  | 0.031 | 0.1440  | -0.124  | 0.051 | 0.0170  | 0.014   | 0.044 | 0.7540  |
| REFINED GRAINS           | 0.023   | 0.016 | 0.1460  | 0.031   | 0.024 | 0.2090  | 0.014   | 0.022 | 0.5420  |
| WHOLE GRAINS             | -0.036  | 0.024 | 0.1300  | -0.038  | 0.037 | 0.3130  | -0.049  | 0.035 | 0.1650  |
| SWEETS                   | 0.003   | 0.011 | 0.8050  | 0.009   | 0.019 | 0.6280  | -0.003  | 0.015 | 0.8320  |
| JAM, MARMALADE           | -0.026  | 0.035 | 0.4510  | -0.019  | 0.054 | 0.7270  | -0.017  | 0.049 | 0.7240  |
| NON-ALCOHOLIC BEVERAGES  | 0.032   | 0.026 | 0.2210  | 0.028   | 0.037 | 0.4550  | 0.034   | 0.041 | 0.4030  |
| LIQUOR                   | 0.166   | 0.186 | 0.3730  | 0.248   | 0.263 | 0.3470  | 0.155   | 0.308 | 0.6150  |
| COFFEE and TEA           | 0.004   | 0.014 | 0.7810  | -0.009  | 0.024 | 0.7190  | 0.009   | 0.019 | 0.6450  |
| PLANT OIL                | -0.038  | 0.018 | 0.0380  | -0.054  | 0.029 | 0.0640  | -0.033  | 0.025 | 0.1870  |
| OLIVE OIL                | 0.005   | 0.020 | 0.7890  | 0.029   | 0.033 | 0.3750  | -0.011  | 0.026 | 0.6870  |
| ANIMAL FAT               | -0.065  | 0.035 | 0.0690  | -0.081  | 0.048 | 0.0920  | -0.048  | 0.057 | 0.3960  |

| Phenotype               | T3      |       |         |         |       |         |         |       |         |
|-------------------------|---------|-------|---------|---------|-------|---------|---------|-------|---------|
|                         | ALL     |       |         | OT      |       |         | NT      |       |         |
|                         | $\beta$ | SE    | P value | $\beta$ | SE    | P value | $\beta$ | SE    | P value |
| MILK and MILK PRODUCTS  | -0.003  | 0.010 | 0.7970  | 0.017   | 0.020 | 0.4020  | -0.001  | 0.013 | 0.9380  |
| RED MEAT                | 0.025   | 0.034 | 0.4600  | 0.029   | 0.053 | 0.5920  | 0.005   | 0.048 | 0.9180  |
| PROCESED MEAT           | -0.002  | 0.025 | 0.9410  | -0.009  | 0.048 | 0.8580  | -0.003  | 0.034 | 0.9200  |
| WHITE MEAT              | -0.024  | 0.029 | 0.3990  | -0.129  | 0.046 | 0.0060  | 0.045   | 0.041 | 0.2810  |
| WHITEFISH               | 0.047   | 0.085 | 0.5780  | 0.190   | 0.155 | 0.2220  | -0.026  | 0.108 | 0.8090  |
| OILY FISH               | -0.088  | 0.095 | 0.3560  | -0.018  | 0.142 | 0.9000  | -0.044  | 0.137 | 0.7480  |
| SEAFOOD                 | 0.084   | 0.073 | 0.2520  | 0.043   | 0.109 | 0.6960  | 0.087   | 0.134 | 0.5150  |
| VEGETABLES              | 0.003   | 0.010 | 0.7550  | 0.008   | 0.016 | 0.6050  | -0.005  | 0.013 | 0.6900  |
| EGGS                    | 0.030   | 0.042 | 0.4810  | -0.007  | 0.071 | 0.9250  | 0.023   | 0.056 | 0.6820  |
| POTATOES                | -0.009  | 0.029 | 0.7510  | -0.021  | 0.048 | 0.6580  | -0.038  | 0.039 | 0.3280  |
| FRUITS                  | -0.007  | 0.019 | 0.7190  | 0.001   | 0.028 | 0.9640  | -0.012  | 0.026 | 0.6350  |
| NUTS                    | -0.009  | 0.032 | 0.7720  | 0.035   | 0.052 | 0.5020  | -0.040  | 0.043 | 0.3530  |
| REFINED GRAINS          | 0.027   | 0.016 | 0.1000  | -0.020  | 0.025 | 0.4300  | 0.059   | 0.022 | 0.0080  |
| WHOLE GRAINS            | 0.035   | 0.024 | 0.1480  | 0.049   | 0.038 | 0.2060  | 0.045   | 0.035 | 0.2020  |
| SWEETS                  | -0.004  | 0.011 | 0.6880  | 0.019   | 0.020 | 0.3340  | -0.013  | 0.014 | 0.3530  |
| JAM, MARMALADE          | -0.009  | 0.035 | 0.7950  | -0.073  | 0.056 | 0.1980  | 0.034   | 0.048 | 0.4830  |
| NON-ALCOHOLIC BEVERAGES | 0.001   | 0.027 | 0.9750  | -0.021  | 0.038 | 0.5760  | 0.032   | 0.041 | 0.4290  |
| LIQUOR                  | -0.230  | 0.188 | 0.2210  | 0.027   | 0.271 | 0.9210  | -0.632  | 0.298 | 0.0350  |
| COFFEE and TEA          | 0.007   | 0.014 | 0.6410  | -0.003  | 0.025 | 0.8920  | 0.019   | 0.019 | 0.3190  |
| PLANT OIL               | 0.069   | 0.018 | <0.0001 | 0.102   | 0.030 | 0.0010  | 0.056   | 0.024 | 0.0220  |
| OLIVE OIL               | 0.029   | 0.020 | 0.1520  | 0.021   | 0.034 | 0.5340  | 0.027   | 0.026 | 0.3050  |
| ANIMAL FAT              | 0.023   | 0.036 | 0.5370  | 0.015   | 0.049 | 0.7540  | 0.056   | 0.057 | 0.3250  |

| Phenotype                      | T4      |       |         |         |       |         |         |       |         |
|--------------------------------|---------|-------|---------|---------|-------|---------|---------|-------|---------|
|                                | ALL     |       |         | OT      |       |         | NT      |       |         |
|                                | $\beta$ | SE    | P value | $\beta$ | SE    | P value | $\beta$ | SE    | P value |
| <b>MILK and MILK PRODUCTS</b>  | -0.012  | 0.010 | 0.2360  | -0.003  | 0.022 | 0.8930  | -0.007  | 0.012 | 0.5490  |
| <b>RED MEAT</b>                | 0.019   | 0.034 | 0.5640  | 0.037   | 0.058 | 0.5270  | -0.027  | 0.045 | 0.5470  |
| <b>PROCESED MEAT</b>           | -0.014  | 0.025 | 0.5650  | -0.037  | 0.052 | 0.4780  | 0.021   | 0.032 | 0.5140  |
| <b>WHITE MEAT</b>              | 0.015   | 0.028 | 0.6000  | -0.058  | 0.050 | 0.2490  | 0.064   | 0.039 | 0.1000  |
| <b>WHITEFISH</b>               | -0.079  | 0.083 | 0.3460  | -0.047  | 0.167 | 0.7800  | -0.146  | 0.101 | 0.1530  |
| <b>OILY FISH</b>               | -0.148  | 0.093 | 0.1130  | -0.194  | 0.154 | 0.2110  | 0.002   | 0.129 | 0.9890  |
| <b>SEAFOOD</b>                 | 0.077   | 0.072 | 0.2870  | 0.152   | 0.118 | 0.1990  | 0.076   | 0.125 | 0.5450  |
| <b>VEGETABLES</b>              | 0.006   | 0.009 | 0.5090  | 0.019   | 0.017 | 0.2750  | 0.001   | 0.012 | 0.9440  |
| <b>EGGS</b>                    | 0.062   | 0.041 | 0.1340  | 0.051   | 0.077 | 0.5070  | 0.059   | 0.053 | 0.2600  |
| <b>POTATOES</b>                | 0.015   | 0.029 | 0.6040  | -0.036  | 0.052 | 0.4870  | 0.039   | 0.037 | 0.2890  |
| <b>FRUITS</b>                  | 0.026   | 0.018 | 0.1520  | 0.012   | 0.031 | 0.6990  | 0.026   | 0.024 | 0.2780  |
| <b>NUTS</b>                    | -0.007  | 0.031 | 0.8140  | 0.069   | 0.056 | 0.2260  | -0.062  | 0.041 | 0.1260  |
| <b>REFINED GRAINS</b>          | 0.023   | 0.016 | 0.1480  | 0.018   | 0.027 | 0.5180  | 0.024   | 0.020 | 0.2340  |
| <b>WHOLE GRAINS</b>            | 0.015   | 0.024 | 0.5360  | -0.002  | 0.042 | 0.9590  | 0.035   | 0.033 | 0.2850  |
| <b>SWEETS</b>                  | -0.005  | 0.011 | 0.6420  | -0.005  | 0.022 | 0.8010  | 0.006   | 0.013 | 0.6520  |
| <b>JAM, MARMALADE</b>          | -0.027  | 0.034 | 0.4400  | -0.046  | 0.061 | 0.4530  | -0.028  | 0.045 | 0.5280  |
| <b>NON-ALCOHOLIC BEVERAGES</b> | 0.037   | 0.026 | 0.1630  | 0.013   | 0.041 | 0.7560  | 0.048   | 0.038 | 0.2160  |
| <b>LIQUOR</b>                  | -0.374  | 0.184 | 0.0420  | -0.350  | 0.293 | 0.2350  | -0.521  | 0.280 | 0.0640  |
| <b>COFFEE and TEA</b>          | 0.023   | 0.014 | 0.1090  | 0.037   | 0.027 | 0.1690  | 0.023   | 0.018 | 0.1980  |
| <b>PLANT OIL</b>               | 0.040   | 0.018 | 0.0270  | 0.089   | 0.032 | 0.0060  | 0.003   | 0.023 | 0.8920  |
| <b>OLIVE OIL</b>               | 0.032   | 0.020 | 0.1010  | 0.013   | 0.036 | 0.7220  | 0.039   | 0.024 | 0.1120  |
| <b>ANIMAL FAT</b>              | -0.010  | 0.036 | 0.7730  | 0.020   | 0.053 | 0.7040  | -0.044  | 0.054 | 0.4080  |



| Phenotype                      | ft4     |       |         |         |       |         |         |       |         |
|--------------------------------|---------|-------|---------|---------|-------|---------|---------|-------|---------|
|                                | ALL     |       |         | OT      |       |         | NT      |       |         |
|                                | $\beta$ | SE    | P value | $\beta$ | SE    | P value | $\beta$ | SE    | P value |
| <b>MILK and MILK PRODUCTS</b>  | 0.001   | 0.011 | 0.9010  | -0.003  | 0.020 | 0.8780  | 0.007   | 0.013 | 0.6050  |
| <b>RED MEAT</b>                | -0.002  | 0.035 | 0.9630  | 0.042   | 0.053 | 0.4320  | -0.036  | 0.049 | 0.4650  |
| <b>PROCESED MEAT</b>           | -0.025  | 0.026 | 0.3350  | -0.077  | 0.048 | 0.1150  | 0.004   | 0.034 | 0.9130  |
| <b>WHITE MEAT</b>              | -0.009  | 0.032 | 0.7850  | -0.011  | 0.047 | 0.8150  | 0.043   | 0.047 | 0.3630  |
| <b>WHITEFISH</b>               | -0.018  | 0.086 | 0.8350  | -0.125  | 0.155 | 0.4240  | -0.019  | 0.111 | 0.8670  |
| <b>OILY FISH</b>               | 0.003   | 0.096 | 0.9710  | -0.052  | 0.145 | 0.7230  | 0.131   | 0.140 | 0.3510  |
| <b>SEAFOOD</b>                 | -0.016  | 0.074 | 0.8300  | 0.099   | 0.109 | 0.3660  | -0.084  | 0.138 | 0.5420  |
| <b>VEGETABLES</b>              | 0.001   | 0.010 | 0.8980  | 0.004   | 0.016 | 0.8150  | -0.001  | 0.013 | 0.9120  |
| <b>EGGS</b>                    | -0.080  | 0.042 | 0.0580  | -0.127  | 0.071 | 0.0780  | -0.041  | 0.056 | 0.4600  |
| <b>POTATOES</b>                | 0.011   | 0.030 | 0.7210  | 0.048   | 0.048 | 0.3250  | -0.013  | 0.041 | 0.7430  |
| <b>FRUITS</b>                  | 0.005   | 0.019 | 0.8000  | 0.026   | 0.028 | 0.3680  | -0.013  | 0.027 | 0.6310  |
| <b>NUTS</b>                    | 0.012   | 0.032 | 0.7170  | 0.033   | 0.053 | 0.5370  | -0.008  | 0.044 | 0.8560  |
| <b>REFINED GRAINS</b>          | 0.006   | 0.016 | 0.7110  | 0.013   | 0.025 | 0.6100  | 0.003   | 0.022 | 0.9090  |
| <b>WHOLE GRAINS</b>            | 0.022   | 0.024 | 0.3550  | 0.037   | 0.039 | 0.3460  | 0.019   | 0.035 | 0.5770  |
| <b>SWEETS</b>                  | 0.002   | 0.011 | 0.8530  | 0.012   | 0.020 | 0.5510  | 0.010   | 0.015 | 0.4860  |
| <b>JAM, MARMALADE</b>          | -0.009  | 0.036 | 0.8100  | -0.048  | 0.056 | 0.3870  | -0.004  | 0.049 | 0.9290  |
| <b>NON-ALCOHOLIC BEVERAGES</b> | -0.012  | 0.027 | 0.6590  | -0.019  | 0.038 | 0.6130  | -0.044  | 0.041 | 0.2840  |
| <b>LIQUOR</b>                  | 0.003   | 0.188 | 0.9890  | 0.216   | 0.270 | 0.4260  | -0.138  | 0.305 | 0.6520  |
| <b>COFFEE and TEA</b>          | 0.000   | 0.015 | 0.9640  | -0.008  | 0.025 | 0.7340  | 0.006   | 0.019 | 0.7580  |
| <b>PLANT OIL</b>               | 0.020   | 0.018 | 0.2710  | 0.028   | 0.030 | 0.3530  | 0.012   | 0.024 | 0.6280  |
| <b>OLIVE OIL</b>               | 0.011   | 0.020 | 0.6040  | 0.005   | 0.034 | 0.8860  | 0.025   | 0.026 | 0.3480  |
| <b>ANIMAL FAT</b>              | 0.030   | 0.036 | 0.4010  | 0.064   | 0.049 | 0.1960  | -0.007  | 0.057 | 0.9000  |

| Phenotype                      | TgAb    |       |         |         |       |         |         |       |         |
|--------------------------------|---------|-------|---------|---------|-------|---------|---------|-------|---------|
|                                | ALL     |       |         | OT      |       |         | NT      |       |         |
|                                | $\beta$ | SE    | P value | $\beta$ | SE    | P value | $\beta$ | SE    | P value |
| <b>MILK and MILK PRODUCTS</b>  | -0.008  | 0.011 | 0.4900  | -0.015  | 0.021 | 0.4620  | -0.008  | 0.014 | 0.5690  |
| <b>RED MEAT</b>                | -0.070  | 0.036 | 0.0520  | -0.124  | 0.056 | 0.0280  | -0.028  | 0.050 | 0.5790  |
| <b>PROCESED MEAT</b>           | 0.004   | 0.027 | 0.8810  | 0.060   | 0.051 | 0.2430  | 0.000   | 0.035 | 0.9880  |
| <b>WHITE MEAT</b>              | -0.061  | 0.030 | 0.0450  | -0.049  | 0.049 | 0.3180  | -0.079  | 0.043 | 0.0700  |
| <b>WHITEFISH</b>               | 0.053   | 0.089 | 0.5540  | -0.196  | 0.162 | 0.2310  | 0.162   | 0.113 | 0.1510  |
| <b>OILY FISH</b>               | -0.037  | 0.099 | 0.7080  | 0.054   | 0.150 | 0.7180  | -0.133  | 0.144 | 0.3570  |
| <b>SEAFOOD</b>                 | -0.022  | 0.077 | 0.7700  | -0.007  | 0.114 | 0.9500  | 0.027   | 0.140 | 0.8450  |
| <b>VEGETABLES</b>              | 0.016   | 0.010 | 0.1050  | 0.009   | 0.017 | 0.6090  | 0.018   | 0.014 | 0.1980  |
| <b>EGGS</b>                    | -0.007  | 0.044 | 0.8660  | 0.064   | 0.075 | 0.3930  | -0.065  | 0.059 | 0.2670  |
| <b>POTATOES</b>                | -0.010  | 0.031 | 0.7450  | 0.072   | 0.051 | 0.1580  | -0.050  | 0.041 | 0.2250  |
| <b>FRUITS</b>                  | 0.022   | 0.020 | 0.2690  | 0.021   | 0.030 | 0.4740  | 0.025   | 0.027 | 0.3460  |
| <b>NUTS</b>                    | 0.017   | 0.033 | 0.6060  | 0.042   | 0.055 | 0.4490  | 0.006   | 0.045 | 0.8870  |
| <b>REFINED GRAINS</b>          | -0.013  | 0.017 | 0.4290  | -0.008  | 0.026 | 0.7700  | -0.011  | 0.023 | 0.6150  |
| <b>WHOLE GRAINS</b>            | -0.031  | 0.025 | 0.2230  | 0.010   | 0.040 | 0.8010  | -0.048  | 0.036 | 0.1930  |
| <b>SWEETS</b>                  | -0.017  | 0.012 | 0.1300  | -0.047  | 0.021 | 0.0280  | 0.000   | 0.015 | 0.9860  |
| <b>JAM, MARMALADE</b>          | 0.034   | 0.037 | 0.3580  | 0.065   | 0.059 | 0.2750  | 0.032   | 0.050 | 0.5270  |
| <b>NON-ALCOHOLIC BEVERAGES</b> | 0.005   | 0.028 | 0.8490  | 0.001   | 0.040 | 0.9740  | -0.020  | 0.043 | 0.6380  |
| <b>LIQUOR</b>                  | 0.131   | 0.196 | 0.5030  | -0.115  | 0.284 | 0.6880  | 0.133   | 0.311 | 0.6680  |
| <b>COFFEE and TEA</b>          | -0.017  | 0.015 | 0.2690  | -0.015  | 0.026 | 0.5760  | -0.013  | 0.020 | 0.5090  |
| <b>PLANT OIL</b>               | 0.022   | 0.019 | 0.2520  | -0.002  | 0.031 | 0.9560  | 0.029   | 0.025 | 0.2510  |
| <b>OLIVE OIL</b>               | 0.012   | 0.021 | 0.5600  | -0.015  | 0.035 | 0.6780  | 0.036   | 0.027 | 0.1840  |
| <b>ANIMAL FAT</b>              | -0.029  | 0.038 | 0.4520  | -0.077  | 0.051 | 0.1350  | 0.010   | 0.060 | 0.8730  |

| Phenotype                      | TPOAb   |       |         |         |       |         |         |       |         |
|--------------------------------|---------|-------|---------|---------|-------|---------|---------|-------|---------|
|                                | ALL     |       |         | OT      |       |         | NT      |       |         |
|                                | $\beta$ | SE    | P value | $\beta$ | SE    | P value | $\beta$ | SE    | P value |
| <b>MILK and MILK PRODUCTS</b>  | 0.007   | 0.011 | 0.4930  | 0.013   | 0.019 | 0.5040  | 0.003   | 0.014 | 0.8560  |
| <b>RED MEAT</b>                | -0.067  | 0.035 | 0.0550  | -0.066  | 0.052 | 0.2050  | -0.085  | 0.050 | 0.0900  |
| <b>PROCESED MEAT</b>           | -0.012  | 0.026 | 0.6370  | 0.010   | 0.047 | 0.8290  | 0.004   | 0.035 | 0.9120  |
| <b>WHITE MEAT</b>              | -0.043  | 0.029 | 0.1420  | -0.050  | 0.045 | 0.2740  | -0.065  | 0.043 | 0.1330  |
| <b>WHITEFISH</b>               | 0.154   | 0.086 | 0.0750  | 0.203   | 0.151 | 0.1820  | 0.209   | 0.113 | 0.0650  |
| <b>OILY FISH</b>               | -0.049  | 0.096 | 0.6090  | -0.104  | 0.139 | 0.4560  | -0.104  | 0.144 | 0.4700  |
| <b>SEAFOOD</b>                 | 0.024   | 0.074 | 0.7460  | 0.034   | 0.106 | 0.7510  | 0.102   | 0.140 | 0.4680  |
| <b>VEGETABLES</b>              | -0.002  | 0.010 | 0.8690  | -0.004  | 0.016 | 0.8050  | -0.005  | 0.014 | 0.7090  |
| <b>EGGS</b>                    | 0.027   | 0.042 | 0.5300  | 0.149   | 0.070 | 0.0350  | -0.049  | 0.059 | 0.4020  |
| <b>POTATOES</b>                | 0.028   | 0.030 | 0.3490  | 0.026   | 0.047 | 0.5810  | 0.022   | 0.041 | 0.5900  |
| <b>FRUITS</b>                  | -0.008  | 0.019 | 0.6580  | -0.018  | 0.028 | 0.5070  | 0.006   | 0.027 | 0.8210  |
| <b>NUTS</b>                    | 0.012   | 0.032 | 0.7110  | -0.005  | 0.051 | 0.9230  | 0.014   | 0.045 | 0.7590  |
| <b>REFINED GRAINS</b>          | -0.027  | 0.016 | 0.1020  | -0.043  | 0.025 | 0.0800  | -0.020  | 0.023 | 0.3870  |
| <b>WHOLE GRAINS</b>            | -0.057  | 0.025 | 0.0220  | -0.028  | 0.038 | 0.4620  | -0.086  | 0.036 | 0.0190  |
| <b>SWEETS</b>                  | -0.011  | 0.011 | 0.3410  | 0.000   | 0.019 | 0.9790  | -0.008  | 0.015 | 0.5940  |
| <b>JAM, MARMALADE</b>          | -0.045  | 0.036 | 0.2100  | -0.118  | 0.055 | 0.0330  | 0.002   | 0.050 | 0.9750  |
| <b>NON-ALCOHOLIC BEVERAGES</b> | 0.000   | 0.027 | 0.9900  | 0.004   | 0.037 | 0.9070  | -0.001  | 0.043 | 0.9790  |
| <b>LIQUOR</b>                  | 0.039   | 0.190 | 0.8390  | -0.235  | 0.265 | 0.3760  | 0.298   | 0.311 | 0.3390  |
| <b>COFFEE and TEA</b>          | -0.007  | 0.015 | 0.6150  | 0.020   | 0.024 | 0.4090  | -0.008  | 0.020 | 0.6950  |
| <b>PLANT OIL</b>               | 0.023   | 0.019 | 0.2140  | 0.034   | 0.029 | 0.2480  | 0.009   | 0.025 | 0.7110  |
| <b>OLIVE OIL</b>               | -0.001  | 0.020 | 0.9550  | -0.007  | 0.033 | 0.8260  | -0.002  | 0.027 | 0.9320  |
| <b>ANIMAL FAT</b>              | 0.046   | 0.037 | 0.2180  | 0.088   | 0.048 | 0.0670  | -0.006  | 0.060 | 0.9210  |

| Phenotype<br>Food groups | Thyroid volume |       |         |         |       |         |         |       |         |
|--------------------------|----------------|-------|---------|---------|-------|---------|---------|-------|---------|
|                          | ALL            |       |         | OT      |       |         | NT      |       |         |
|                          | $\beta$        | SE    | P value | $\beta$ | SE    | P value | $\beta$ | SE    | P value |
| MILK and MILK PRODUCTS   | 0.004          | 0.011 | 0.6720  | 0.022   | 0.024 | 0.3620  | 0.006   | 0.011 | 0.5990  |
| RED MEAT                 | 0.007          | 0.035 | 0.8460  | 0.013   | 0.065 | 0.8400  | -0.031  | 0.042 | 0.4660  |
| PROCESED MEAT            | -0.007         | 0.026 | 0.7800  | -0.041  | 0.061 | 0.5000  | -0.016  | 0.029 | 0.5950  |
| WHITE MEAT               | -0.040         | 0.031 | 0.1930  | -0.013  | 0.055 | 0.8100  | -0.072  | 0.040 | 0.0750  |
| WHITEFISH                | -0.127         | 0.084 | 0.1320  | -0.112  | 0.189 | 0.5520  | -0.077  | 0.093 | 0.4120  |
| OILY FISH                | -0.042         | 0.093 | 0.6560  | -0.328  | 0.173 | 0.0610  | -0.024  | 0.118 | 0.8360  |
| SEAFOOD                  | 0.040          | 0.074 | 0.5870  | 0.246   | 0.140 | 0.0820  | -0.140  | 0.116 | 0.2280  |
| VEGETABLES               | 0.016          | 0.010 | 0.1110  | 0.020   | 0.020 | 0.3270  | 0.018   | 0.011 | 0.1170  |
| EGGS                     | 0.037          | 0.041 | 0.3670  | 0.188   | 0.084 | 0.0280  | -0.037  | 0.048 | 0.4430  |
| POTATOES                 | -0.058         | 0.030 | 0.0530  | -0.004  | 0.060 | 0.9450  | -0.087  | 0.035 | 0.0130  |
| FRUITS                   | 0.009          | 0.019 | 0.6220  | -0.006  | 0.034 | 0.8710  | 0.013   | 0.023 | 0.5580  |
| NUTS                     | -0.008         | 0.032 | 0.8090  | 0.019   | 0.066 | 0.7700  | -0.017  | 0.037 | 0.6540  |
| REFINED GRAINS           | 0.011          | 0.016 | 0.4780  | 0.030   | 0.030 | 0.3220  | 0.011   | 0.019 | 0.5750  |
| WHOLE GRAINS             | -0.044         | 0.024 | 0.0700  | -0.037  | 0.047 | 0.4310  | -0.054  | 0.030 | 0.0720  |
| SWEETS                   | 0.011          | 0.011 | 0.3320  | 0.017   | 0.024 | 0.4990  | 0.010   | 0.012 | 0.4310  |
| JAM, MARMALADE           | -0.019         | 0.035 | 0.5890  | -0.076  | 0.067 | 0.2590  | 0.020   | 0.041 | 0.6330  |
| NON-ALCOHOLIC BEVERAGES  | 0.009          | 0.026 | 0.7280  | 0.008   | 0.046 | 0.8670  | 0.023   | 0.034 | 0.5100  |
| LIQUOR                   | 0.122          | 0.205 | 0.5540  | -0.301  | 0.396 | 0.4490  | 0.289   | 0.256 | 0.2600  |
| COFFEE and TEA           | 0.006          | 0.014 | 0.6720  | 0.042   | 0.029 | 0.1540  | -0.007  | 0.016 | 0.6480  |
| PLANT OIL                | 0.005          | 0.018 | 0.7680  | -0.006  | 0.037 | 0.8650  | 0.017   | 0.021 | 0.4260  |
| OLIVE OIL                | 0.021          | 0.020 | 0.3150  | 0.011   | 0.042 | 0.7850  | 0.026   | 0.023 | 0.2630  |
| ANIMAL FAT               | -0.069         | 0.036 | 0.0550  | -0.029  | 0.061 | 0.6370  | -0.064  | 0.048 | 0.1790  |

| Phenotype               | Systolic blood pressure |       |         |         |       |         |         |       |         |
|-------------------------|-------------------------|-------|---------|---------|-------|---------|---------|-------|---------|
|                         | ALL                     |       |         | OT      |       |         | NT      |       |         |
|                         | $\beta$                 | SE    | P value | $\beta$ | SE    | P value | $\beta$ | SE    | P value |
| MILK and MILK PRODUCTS  | 0.005                   | 0.012 | 0.6630  | -0.014  | 0.026 | 0.582   | 0.014   | 0.014 | 0.3450  |
| RED MEAT                | 0.031                   | 0.042 | 0.4570  | 0.056   | 0.070 | 0.432   | 0.003   | 0.056 | 0.9640  |
| PROCESED MEAT           | -0.021                  | 0.028 | 0.4610  | 0.061   | 0.059 | 0.308   | -0.050  | 0.036 | 0.1690  |
| WHITE MEAT              | 0.013                   | 0.034 | 0.7070  | 0.001   | 0.050 | 0.986   | 0.010   | 0.057 | 0.8620  |
| WHITEFISH               | -0.063                  | 0.107 | 0.5540  | -0.131  | 0.192 | 0.499   | -0.021  | 0.140 | 0.8800  |
| OILY FISH               | 0.138                   | 0.107 | 0.2000  | 0.203   | 0.166 | 0.225   | 0.102   | 0.163 | 0.5300  |
| SEAFOOD                 | -0.057                  | 0.081 | 0.4790  | -0.118  | 0.148 | 0.428   | -0.060  | 0.160 | 0.7090  |
| VEGETABLES              | 0.012                   | 0.012 | 0.2980  | 0.048   | 0.022 | 0.030   | -0.006  | 0.016 | 0.7290  |
| EGGS                    | -0.045                  | 0.054 | 0.4010  | 0.112   | 0.103 | 0.282   | -0.151  | 0.071 | 0.0370  |
| POTATOES                | 0.039                   | 0.036 | 0.2810  | -0.047  | 0.067 | 0.486   | 0.030   | 0.048 | 0.5320  |
| FRUITS                  | -0.012                  | 0.022 | 0.5750  | -0.057  | 0.036 | 0.118   | 0.000   | 0.030 | 0.9940  |
| NUTS                    | -0.013                  | 0.039 | 0.7300  | 0.060   | 0.064 | 0.355   | -0.044  | 0.054 | 0.4180  |
| REFINED GRAINS          | 0.019                   | 0.019 | 0.3060  | -0.040  | 0.033 | 0.221   | 0.050   | 0.025 | 0.0500  |
| WHOLE GRAINS            | -0.007                  | 0.027 | 0.8070  | -0.013  | 0.046 | 0.775   | 0.028   | 0.041 | 0.4890  |
| SWEETS                  | 0.005                   | 0.012 | 0.6850  | 0.004   | 0.022 | 0.846   | 0.002   | 0.016 | 0.9100  |
| JAM, MARMALADE          | -0.053                  | 0.043 | 0.2180  | -0.071  | 0.068 | 0.305   | 0.021   | 0.061 | 0.7340  |
| NON-ALCOHOLIC BEVERAGES | -0.021                  | 0.029 | 0.4750  | 0.054   | 0.048 | 0.260   | -0.055  | 0.044 | 0.2110  |
| LIQUOR                  | -0.068                  | 0.187 | 0.7160  | -0.226  | 0.278 | 0.419   | -0.008  | 0.310 | 0.9790  |
| COFFEE and TEA          | 0.003                   | 0.017 | 0.8760  | 0.000   | 0.030 | 0.986   | 0.025   | 0.023 | 0.2730  |
| PLANT OIL               | -0.009                  | 0.022 | 0.6700  | -0.006  | 0.038 | 0.879   | -0.024  | 0.028 | 0.3870  |
| OLIVE OIL               | -0.031                  | 0.024 | 0.1870  | -0.159  | 0.047 | 0.001   | -0.017  | 0.031 | 0.5760  |
| ANIMAL FAT              | -0.016                  | 0.041 | 0.6940  | -0.050  | 0.070 | 0.477   | -0.018  | 0.056 | 0.7450  |

| Phenotype                      | Diastolic blood pressure |       |         |         |       |         |         |       |         |
|--------------------------------|--------------------------|-------|---------|---------|-------|---------|---------|-------|---------|
|                                | ALL                      |       |         | OT      |       |         | NT      |       |         |
|                                | $\beta$                  | SE    | P value | $\beta$ | SE    | P value | $\beta$ | SE    | P value |
| <b>MILK and MILK PRODUCTS</b>  | 0.011                    | 0.012 | 0.3640  | 0.002   | 0.029 | 0.937   | 0.013   | 0.014 | 0.3650  |
| <b>RED MEAT</b>                | 0.033                    | 0.043 | 0.4450  | 0.101   | 0.078 | 0.199   | 0.015   | 0.057 | 0.7990  |
| <b>PROCESED MEAT</b>           | -0.037                   | 0.029 | 0.2060  | 0.036   | 0.065 | 0.583   | -0.034  | 0.036 | 0.3540  |
| <b>WHITE MEAT</b>              | 0.001                    | 0.035 | 0.9700  | 0.032   | 0.056 | 0.563   | -0.071  | 0.057 | 0.2140  |
| <b>WHITEFISH</b>               | -0.173                   | 0.109 | 0.1150  | -0.433  | 0.211 | 0.045   | -0.063  | 0.139 | 0.6520  |
| <b>OILY FISH</b>               | 0.030                    | 0.109 | 0.7860  | 0.229   | 0.182 | 0.215   | -0.079  | 0.161 | 0.6270  |
| <b>SEAFOOD</b>                 | 0.127                    | 0.082 | 0.1250  | -0.016  | 0.163 | 0.921   | 0.281   | 0.159 | 0.0800  |
| <b>VEGETABLES</b>              | -0.004                   | 0.012 | 0.7170  | 0.020   | 0.024 | 0.391   | -0.024  | 0.016 | 0.1280  |
| <b>EGGS</b>                    | -0.008                   | 0.055 | 0.8790  | -0.075  | 0.114 | 0.512   | -0.070  | 0.071 | 0.3280  |
| <b>POTATOES</b>                | 0.085                    | 0.037 | 0.0240  | 0.048   | 0.074 | 0.522   | 0.086   | 0.048 | 0.0740  |
| <b>FRUITS</b>                  | 0.000                    | 0.022 | 0.9930  | 0.025   | 0.039 | 0.532   | -0.015  | 0.029 | 0.6010  |
| <b>NUTS</b>                    | -0.024                   | 0.039 | 0.5440  | 0.068   | 0.071 | 0.341   | -0.031  | 0.054 | 0.5700  |
| <b>REFINED GRAINS</b>          | -0.014                   | 0.019 | 0.4790  | -0.072  | 0.036 | 0.048   | 0.001   | 0.025 | 0.9650  |
| <b>WHOLE GRAINS</b>            | -0.025                   | 0.028 | 0.3700  | 0.021   | 0.050 | 0.671   | -0.041  | 0.042 | 0.3290  |
| <b>SWEETS</b>                  | 0.002                    | 0.012 | 0.8980  | -0.023  | 0.025 | 0.361   | 0.009   | 0.016 | 0.5860  |
| <b>JAM, MARMALADE</b>          | -0.073                   | 0.044 | 0.0980  | -0.070  | 0.075 | 0.355   | -0.019  | 0.060 | 0.7550  |
| <b>NON-ALCOHOLIC BEVERAGES</b> | -0.042                   | 0.031 | 0.1720  | 0.024   | 0.052 | 0.643   | -0.033  | 0.046 | 0.4770  |
| <b>LIQUOR</b>                  | -0.145                   | 0.191 | 0.4480  | -0.156  | 0.306 | 0.613   | 0.065   | 0.308 | 0.8320  |
| <b>COFFEE and TEA</b>          | 0.005                    | 0.017 | 0.7910  | -0.035  | 0.033 | 0.288   | 0.038   | 0.022 | 0.0930  |
| <b>PLANT OIL</b>               | -0.018                   | 0.022 | 0.4170  | -0.013  | 0.042 | 0.763   | -0.041  | 0.027 | 0.1370  |
| <b>OLIVE OIL</b>               | -0.011                   | 0.024 | 0.6620  | -0.124  | 0.051 | 0.019   | 0.018   | 0.031 | 0.5620  |
| <b>ANIMAL FAT</b>              | -0.032                   | 0.042 | 0.4410  | -0.105  | 0.077 | 0.177   | -0.046  | 0.055 | 0.4130  |

Analyses were performed in 3 groups: ALL - entire set of 491 HT patients; OT - 177 HT patients on LT4 therapy; NT - 289 HT patients without LT4 therapy. For 25 HT patients information on LT4 therapy was not available. Statistically significant values ( $P < 0.0055$ ) are dark grey shaded, nominally significant values ( $0.01 < P > 0.005$ ) are light grey shaded. Linear regression model was used, where selected quantitative trait was dependent variable and 22 food groups were independent variables. Age, gender and physical activity were also included as covariates. For thyroid volume, systolic and diastolic blood pressure we used BSA and TSH as covariates, while for TSH and fT4, we used BSA as covariate. In the group of all HT patients we used LT4 therapy status as an additional covariate, whereas, in the sub-group of HT patients that were on LT4 therapy, we used LT4 therapy dose and weight ratio as additional covariate.  $\beta$  - effect size, SE - standard error.

Supplementary Table 7. Association of 22 food groups with 16 symptoms of hypothyroidism in 289 HT patients without therapy

| Symptoms<br>Food groups        | Weakness            |         | Dry, rough skin     |         | Slow speech         |         | Edem of the eyes   |         |
|--------------------------------|---------------------|---------|---------------------|---------|---------------------|---------|--------------------|---------|
|                                | OR (95% CI)         | P value | OR (95% CI)         | P value | OR (95% CI)         | P value | OR (95% CI)        | P value |
| <b>MILK and MILK PRODUCTS</b>  | 1.01 (0.94 - 1.08)  | 0.8500  | 0.998 (0.93 - 1.07) | 0.9580  | 0.92 (0.77 - 1.10)  | 0.3470  | 1.00 (0.91 - 1.09) | 0.9970  |
| <b>RED MEAT</b>                | 1.05 (0.81 - 1.36)  | 0.7340  | 0.92 (0.7 - 1.22)   | 0.5760  | 1.23 (0.71 - 2.13)  | 0.4680  | 0.89 (0.61 - 1.29) | 0.5320  |
| <b>PROCESEED MEAT</b>          | 0.98 (0.81 - 1.17)  | 0.7840  | 1.10 (0.92 - 1.32)  | 0.2940  | 1.17 (0.77 - 1.78)  | 0.4680  | 0.93 (0.73 - 1.19) | 0.5620  |
| <b>WHITE MEAT</b>              | 1.09 (0.83 - 1.43)  | 0.5230  | 1.40 (1.04 - 1.89)  | 0.0260  | 0.88 (0.40 - 1.94)  | 0.7560  | 1.39 (0.96 - 2.01) | 0.0860  |
| <b>WHITEFISH</b>               | 0.79 (0.47 - 1.33)  | 0.3660  | 1.22 (0.70 - 2.10)  | 0.4860  | 1.21 (0.33 - 4.45)  | 0.7720  | 1.15 (0.62 - 2.16) | 0.6570  |
| <b>OILY FISH</b>               | 1.14 (0.55 - 2.36)  | 0.7260  | 1.08 (0.50 - 2.31)  | 0.8450  | 1.33 (0.20 - 8.83)  | 0.7690  | 2.01 (0.75 - 5.40) | 0.1660  |
| <b>SEAFOOD</b>                 | 1.14 (0.56 - 2.31)  | 0.7170  | 1.10 (0.55 - 2.18)  | 0.7890  | 0.80 (0.15 - 4.13)  | 0.7860  | 0.81 (0.34 - 1.92) | 0.6330  |
| <b>VEGETABLES</b>              | 0.96 (0.89 - 1.03)  | 0.2620  | 0.94 (0.87 - 1.02)  | 0.1340  | 0.98 (0.81 - 1.18)  | 0.8250  | 1.01 (0.92 - 1.11) | 0.8170  |
| <b>EGGS</b>                    | 1.13 (0.84 - 1.53)  | 0.4200  | 0.98 (0.71 - 1.33)  | 0.8740  | 1.11 (0.29 - 4.23)  | 0.8740  | 0.86 (0.55 - 1.34) | 0.5050  |
| <b>POTATOES</b>                | 0.95 (0.76 - 1.19)  | 0.6630  | 0.89 (0.69 - 1.15)  | 0.3760  | 1.03 (0.56 - 1.90)  | 0.9150  | 1.05 (0.74 - 1.48) | 0.7980  |
| <b>FRUITS</b>                  | 0.995 (0.86 - 1.15) | 0.9440  | 1.09 (0.94 - 1.26)  | 0.2420  | 0.99 (0.68 - 1.42)  | 0.9410  | 0.80 (0.64 - 0.98) | 0.0350  |
| <b>NUTS</b>                    | 0.87 (0.70 - 1.10)  | 0.2390  | 1.17 (0.92 - 1.47)  | 0.2020  | 0.98 (0.55 - 1.75)  | 0.9410  | 0.96 (0.71 - 1.30) | 0.7950  |
| <b>REFINED GRAINS</b>          | 0.93 (0.83 - 1.05)  | 0.2500  | 1.08 (0.95 - 1.22)  | 0.2470  | 1.02 (0.74 - 1.41)  | 0.8880  | 0.96 (0.81 - 1.13) | 0.6090  |
| <b>WHOLE GRAINS</b>            | 0.96 (0.80 - 1.14)  | 0.6130  | 0.98 (0.80 - 1.20)  | 0.8310  | 0.84 (0.54 - 1.30)  | 0.4250  | 1.09 (0.86 - 1.37) | 0.4890  |
| <b>SWEETS</b>                  | 0.95 (0.88 - 1.03)  | 0.1930  | 0.95 (0.87 - 1.04)  | 0.2290  | 0.71 (0.45 - 1.13)  | 0.1430  | 0.91 (0.79 - 1.03) | 0.1400  |
| <b>JAM, MARMALADE</b>          | 1.14 (0.86 - 1.52)  | 0.3670  | 1.11 (0.83 - 1.49)  | 0.4890  | 1.11 (0.52 - 2.34)  | 0.7920  | 0.89 (0.57 - 1.37) | 0.5930  |
| <b>NON-ALCOHOLIC BEVERAGES</b> | 0.92 (0.74 - 1.16)  | 0.4880  | 1.08 (0.86 - 1.37)  | 0.5060  | 1.65 (0.95 - 2.87)  | 0.0770  | 1.10 (0.79 - 1.54) | 0.5610  |
| <b>LIQUOR</b>                  | 0.84 (0.15 - 4.73)  | 0.8460  | 1.88 (0.42 - 8.36)  | 0.4090  | 0.97 (0.0 - 6747)   | 0.9950  | 1.17 (0.2 - 6.75)  | 0.8600  |
| <b>COFFEE and TEA</b>          | 1.03 (0.93 - 1.14)  | 0.6290  | 0.93 (0.84 - 1.02)  | 0.1320  | 0.999 (0.78 - 1.28) | 0.9970  | 1.06 (0.92 - 1.21) | 0.4270  |
| <b>PLANT OIL</b>               | 1.03 (0.90 - 1.18)  | 0.6510  | 0.97 (0.85 - 1.11)  | 0.6310  | 0.87 (0.61 - 1.25)  | 0.4530  | 0.92 (0.76 - 1.11) | 0.3650  |
| <b>OLIVE OIL</b>               | 0.99 (0.85 - 1.14)  | 0.8560  | 1.18 (1.01 - 1.37)  | 0.0330  | 0.88 (0.63 - 1.24)  | 0.4660  | 1.04 (0.85 - 1.27) | 0.7080  |
| <b>ANIMAL FAT</b>              | 0.98 (0.73 - 1.32)  | 0.8790  | 1.08 (0.79 - 1.48)  | 0.6170  | 0.27 (0.04 - 1.90)  | 0.1890  | 1.32 (0.83 - 2.09) | 0.2430  |

| Symptoms<br>Food groups | Sensitivity to coldness |         | Cold skin          |         | Face edem           |         | Fragile hair        |         |
|-------------------------|-------------------------|---------|--------------------|---------|---------------------|---------|---------------------|---------|
|                         | OR (95% CI)             | P value | OR (95% CI)        | P value | OR (95% CI)         | P value | OR (95% CI)         | P value |
| MILK and MILK PRODUCTS  | 0.98 (0.92 - 1.05)      | 0.6290  | 1.01 (0.94 - 1.08) | 0.8690  | 0.98 (0.86 - 1.11)  | 0.7040  | 0.95 (0.89 - 1.02)  | 0.1750  |
| RED MEAT                | 0.89 (0.69 - 1.16)      | 0.4070  | 0.88 (0.66 - 1.17) | 0.3640  | 1.31 (0.83 - 2.07)  | 0.2480  | 0.99 (0.74 - 1.31)  | 0.9330  |
| PROCESED MEAT           | 1.01 (0.85 - 1.19)      | 0.9360  | 0.99 (0.82 - 1.19) | 0.8720  | 1.001 (0.73 - 1.37) | 0.9950  | 0.999 (0.84 - 1.19) | 0.9900  |
| WHITE MEAT              | 1.10 (0.84 - 1.44)      | 0.4790  | 1.26 (0.92 - 1.70) | 0.1450  | 0.95 (0.58 - 1.54)  | 0.8220  | 1.20 (0.89 - 1.63)  | 0.2310  |
| WHITEFISH               | 0.91 (0.54 - 1.55)      | 0.7430  | 0.91 (0.45 - 1.83) | 0.7830  | 1.37 (0.61 - 3.08)  | 0.4510  | 1.39 (0.69 - 2.81)  | 0.3550  |
| OILY FISH               | 1.04 (0.50 - 2.18)      | 0.9200  | 1.08 (0.47 - 2.46) | 0.8600  | 0.68 (0.20 - 2.35)  | 0.5380  | 0.74 (0.31 - 1.75)  | 0.4930  |
| SEAFOOD                 | 1.00 (0.50 - 1.20)      | 0.9990  | 1.55 (0.77 - 3.10) | 0.2200  | 1.05 (0.36 - 3.03)  | 0.9340  | 1.54 (0.75 - 3.15)  | 0.2360  |
| VEGETABLES              | 0.97 (0.90 - 1.04)      | 0.3900  | 0.97 (0.90 - 1.05) | 0.5200  | 1.08 (0.97 - 1.22)  | 0.1720  | 1.02 (0.94 - 1.11)  | 0.5830  |
| EGGS                    | 0.89 (0.66 - 1.21)      | 0.4700  | 1.07 (0.77 - 1.47) | 0.6990  | 0.94 (0.46 - 1.91)  | 0.8540  | 1.24 (0.91 - 1.71)  | 0.1800  |
| POTATOES                | 1.10 (0.88 - 1.37)      | 0.4160  | 1.31 (1.03 - 1.67) | 0.0260  | 1.44 (0.94 - 2.21)  | 0.0920  | 0.82 (0.62 - 1.08)  | 0.1530  |
| FRUITS                  | 1.07 (0.93 - 1.22)      | 0.3280  | 1.08 (0.93 - 1.26) | 0.3380  | 1.10 (0.88 - 1.38)  | 0.3850  | 1.17 (1.02 - 1.36)  | 0.0310  |
| NUTS                    | 1.10 (0.88 - 1.39)      | 0.3970  | 1.20 (0.95 - 1.53) | 0.1330  | 1.54 (1.06 - 2.24)  | 0.0220  | 1.05 (0.83 - 1.34)  | 0.6750  |
| REFINED GRAINS          | 1.02 (0.91 - 1.15)      | 0.7290  | 0.94 (0.83 - 1.07) | 0.3300  | 0.94 (0.75 - 1.17)  | 0.5700  | 1.05 (0.93 - 1.20)  | 0.4280  |
| WHOLE GRAINS            | 1.03 (0.86 - 1.23)      | 0.7420  | 0.92 (0.75 - 1.14) | 0.4560  | 0.85 (0.60 - 1.21)  | 0.3650  | 1.02 (0.84 - 1.24)  | 0.8420  |
| SWEETS                  | 0.97 (0.89 - 1.05)      | 0.4540  | 1.06 (0.97 - 1.15) | 0.1930  | 0.85 (0.69 - 1.05)  | 0.1390  | 0.997 (0.91 - 1.09) | 0.9460  |
| JAM, MARMALADE          | 0.93 (0.68 - 1.27)      | 0.6440  | 0.93 (0.68 - 1.28) | 0.6560  | 0.80 (0.36 - 1.79)  | 0.5850  | 0.89 (0.63 - 1.27)  | 0.5280  |
| NON-ALCOHOLIC BEVERAGES | 0.97 (0.77 - 1.22)      | 0.7800  | 1.05 (0.84 - 1.32) | 0.6750  | 1.33 (0.87 - 2.03)  | 0.1890  | 1.17 (0.93 - 1.47)  | 0.1730  |
| LIQUOR                  | 0.29 (0.03 - 2.99)      | 0.3010  | 1.06 (0.19 - 5.81) | 0.9500  | 1.02 (0.02 - 53.8)  | 0.9910  | 0.54 (0.06 - 4.56)  | 0.5690  |
| COFFEE and TEA          | 1.09 (0.99 - 1.21)      | 0.0920  | 0.90 (0.81 - 1.00) | 0.0500  | 0.96 (0.81 - 1.14)  | 0.6730  | 0.95 (0.86 - 1.05)  | 0.3130  |
| PLANT OIL               | 0.97 (0.86 - 1.11)      | 0.6750  | 0.96 (0.84 - 1.10) | 0.5650  | 1.09 (0.85 - 1.40)  | 0.5080  | 0.995 (0.86 - 1.14) | 0.9390  |
| OLIVE OIL               | 0.98 (0.85 - 1.13)      | 0.7840  | 1.07 (0.92 - 1.25) | 0.3830  | 1.08 (0.82 - 1.40)  | 0.5950  | 0.95 (0.81 - 1.11)  | 0.4960  |
| ANIMAL FAT              | 1.03 (0.75 - 1.42)      | 0.8580  | 1.08 (0.79 - 1.49) | 0.6240  | 1.32 (0.81 - 2.14)  | 0.2600  | 1.08 (0.77 - 1.51)  | 0.6750  |



| Symptoms<br>Food groups | Pale skin          |         | Memory disturbance |         | Constipation        |         | Increase in weight  |         |
|-------------------------|--------------------|---------|--------------------|---------|---------------------|---------|---------------------|---------|
|                         | OR (95% CI)        | P value | OR (95% CI)        | P value | OR (95% CI)         | P value | OR (95% CI)         | P value |
| MILK and MILK PRODUCTS  | 1.01 (0.94 - 1.08) | 0.8160  | 1.03 (0.96 - 1.11) | 0.3870  | 1.02 (0.93 - 1.12)  | 0.6380  | 1.05 (0.97 - 1.13)  | 0.2390  |
| RED MEAT                | 0.96 (0.73 - 1.27) | 0.7920  | 0.71 (0.51 - 0.99) | 0.0410  | 0.97 (0.68 - 1.40)  | 0.8760  | 0.96 (0.70 - 1.31)  | 0.8090  |
| PROCESED MEAT           | 0.93 (0.77 - 1.11) | 0.4050  | 0.82 (0.65 - 1.03) | 0.0890  | 0.84 (0.64 - 1.11)  | 0.2240  | 0.91 (0.74 - 1.12)  | 0.3680  |
| WHITE MEAT              | 1.02 (0.77 - 1.35) | 0.8940  | 1.02 (0.73 - 1.42) | 0.9230  | 0.99 (0.64 - 1.54)  | 0.9560  | 0.96 (0.69 - 1.32)  | 0.7950  |
| WHITEFISH               | 1.82 (0.97 - 3.40) | 0.0620  | 0.33 (0.11 - 0.99) | 0.0480  | 1.35 (0.65 - 2.82)  | 0.4240  | 1.22 (0.63 - 2.37)  | 0.5590  |
| OILY FISH               | 0.62 (0.29 - 1.36) | 0.2370  | 4.66 (1.52 - 14.2) | 0.0070  | 1.69 (0.59 - 4.86)  | 0.3320  | 1.32 (0.54 - 3.19)  | 0.5440  |
| SEAFOOD                 | 0.94 (0.46 - 1.94) | 0.8660  | 3.05 (1.13 - 8.22) | 0.0280  | 0.88 (0.37 - 2.09)  | 0.7790  | 1.19 (0.55 - 2.59)  | 0.6520  |
| VEGETABLES              | 0.97 (0.90 - 1.04) | 0.3750  | 0.98 (0.89 - 1.08) | 0.6260  | 0.99 (0.90 - 1.09)  | 0.8370  | 0.95 (0.87 - 1.03)  | 0.2230  |
| EGGS                    | 1.02 (0.73 - 1.41) | 0.9210  | 0.58 (0.34 - 0.98) | 0.0420  | 1.37 (0.91 - 2.04)  | 0.1290  | 1.007 (0.71 - 1.42) | 0.9680  |
| POTATOES                | 1.04 (0.82 - 1.31) | 0.7540  | 1.15 (0.85 - 1.54) | 0.3660  | 0.72 (0.51 - 1.03)  | 0.0720  | 1.07 (0.71 - 1.42)  | 0.6300  |
| FRUITS                  | 1.07 (0.93 - 1.23) | 0.3740  | 1.06 (0.90 - 1.24) | 0.5130  | 1.38 (1.12 - 1.70)  | 0.0020  | 0.98 (0.83 - 1.14)  | 0.7650  |
| NUTS                    | 0.99 (0.77 - 1.27) | 0.9140  | 1.01 (0.76 - 1.32) | 0.9720  | 0.94 (0.67 - 1.30)  | 0.6990  | 0.99 (0.76 - 1.30)  | 0.9680  |
| REFINED GRAINS          | 0.99 (0.88 - 1.12) | 0.8920  | 0.94 (0.80 - 1.10) | 0.4240  | 0.997 (0.84 - 1.19) | 0.9710  | 0.95 (0.83 - 1.10)  | 0.4700  |
| WHOLE GRAINS            | 0.82 (0.66 - 1.01) | 0.0560  | 0.88 (0.70 - 1.12) | 0.3000  | 1.15 (0.90 - 1.47)  | 0.2490  | 0.94 (0.77 - 1.16)  | 0.5870  |
| SWEETS                  | 0.93 (0.85 - 1.02) | 0.1060  | 0.88 (0.79 - 0.99) | 0.0280  | 0.98 (0.87 - 1.10)  | 0.7400  | 1.04 (0.96 - 1.14)  | 0.3380  |
| JAM, MARMALADE          | 1.01 (0.72 - 1.42) | 0.9410  | 0.97 (0.64 - 1.47) | 0.8860  | 1.10 (0.71 - 1.71)  | 0.6700  | 1.08 (0.75 - 1.55)  | 0.6740  |
| NON-ALCOHOLIC BEVERAGES | 1.10 (0.88 - 1.38) | 0.4090  | 1.07 (0.83 - 1.39) | 0.6050  | 1.05 (0.80 - 1.38)  | 0.7230  | 1.23 (0.97 - 1.57)  | 0.0860  |
| LIQUOR                  | 1.35 (0.22 - 8.43) | 0.7500  | 4.11 (0.69 - 24.5) | 0.1210  | 0.61 (0.01 - 30.4)  | 0.8020  | 0.63 (0.06 - 6.61)  | 0.7020  |
| COFFEE and TEA          | 1.01 (0.91 - 1.12) | 0.8880  | 0.91 (0.80 - 1.03) | 0.1290  | 0.81 (0.70 - 0.94)  | 0.0040  | 1.04 (0.93 - 1.16)  | 0.4850  |
| PLANT OIL               | 0.92 (0.81 - 1.06) | 0.2480  | 1.08 (0.92 - 1.26) | 0.3720  | 1.05 (0.87 - 1.26)  | 0.6330  | 0.95 (0.81 - 1.10)  | 0.4850  |
| OLIVE OIL               | 0.99 (0.86 - 1.15) | 0.9060  | 0.84 (0.70 - 1.01) | 0.0570  | 0.86 (0.69 - 1.06)  | 0.1560  | 0.995 (0.84 - 1.18) | 0.9570  |
| ANIMAL FAT              | 1.08 (0.80 - 1.47) | 0.6020  | 0.70 (0.41 - 1.20) | 0.1980  | 1.21 (0.79 - 1.85)  | 0.3810  | 0.84 (0.51 - 1.38)  | 0.4830  |

| Symptoms<br>Food groups | Loss of skin hair  |         | Dyspnea            |         | Peripheral edems   |         | Harsh voice        |         |
|-------------------------|--------------------|---------|--------------------|---------|--------------------|---------|--------------------|---------|
|                         | OR (95% CI)        | P value | OR (95% CI)        | P value | OR (95% CI)        | P value | OR (95% CI)        | P value |
| MILK and MILK PRODUCTS  | 1.21 (1.05 - 1.39) | 0.0080  | 0.94 (0.82 - 1.08) | 0.2840  | 0.94 (0.82 - 1.08) | 0.3750  | 1.08 (0.99 - 1.18) | 0.0860  |
| RED MEAT                | 1.13 (0.72 - 1.77) | 0.6040  | 0.82 (0.48 - 1.39) | 0.5180  | 0.82 (0.48 - 1.39) | 0.4560  | 0.88 (0.63 - 1.25) | 0.4750  |
| PROCESED MEAT           | 1.15 (0.86 - 1.53) | 0.3580  | 1.24 (0.90 - 1.70) | 0.4560  | 1.24 (0.90 - 1.70) | 0.1950  | 0.95 (0.74 - 1.21) | 0.6610  |
| WHITE MEAT              | 0.71 (0.42 - 1.20) | 0.1980  | 0.94 (0.54 - 1.64) | 0.0370  | 0.94 (0.54 - 1.64) | 0.8180  | 1.21 (0.85 - 1.71) | 0.2910  |
| WHITEFISH               | 0.94 (0.39 - 2.26) | 0.8880  | 0.39 (0.10 - 1.59) | 0.0550  | 0.39 (0.10 - 1.59) | 0.1900  | 0.92 (0.50 - 1.69) | 0.7890  |
| OILY FISH               | 0.87 (0.21 - 3.63) | 0.8480  | 2.67 (0.80 - 8.94) | 0.6710  | 2.67 (0.80 - 8.94) | 0.1120  | 1.38 (0.50 - 3.79) | 0.5350  |
| SEAFOOD                 | 0.71 (0.23 - 2.26) | 0.5660  | 4.14 (1.29 - 13.3) | 0.3290  | 4.14 (1.29 - 13.3) | 0.0170  | 1.05 (0.45 - 2.44) | 0.9180  |
| VEGETABLES              | 1.03 (0.92 - 1.16) | 0.5950  | 1.01 (0.88 - 1.16) | 0.3270  | 1.01 (0.88 - 1.16) | 0.8940  | 1.03 (0.94 - 1.13) | 0.4780  |
| EGGS                    | 0.37 (0.14 - 0.98) | 0.0440  | 0.83 (0.43 - 1.60) | 0.7660  | 0.83 (0.43 - 1.60) | 0.5810  | 0.81 (0.52 - 1.27) | 0.3570  |
| POTATOES                | 0.94 (0.59 - 1.49) | 0.7830  | 1.57 (1.01 - 2.43) | 0.5330  | 1.57 (1.01 - 2.43) | 0.0460  | 1.07 (0.80 - 1.44) | 0.6570  |
| FRUITS                  | 0.93 (0.73 - 1.20) | 0.5930  | 0.82 (0.65 - 1.04) | 0.8200  | 0.82 (0.65 - 1.04) | 0.1070  | 0.92 (0.77 - 1.12) | 0.4070  |
| NUTS                    | 0.84 (0.50 - 1.41) | 0.5130  | 1.24 (0.84 - 1.84) | 0.0320  | 1.24 (0.84 - 1.84) | 0.2840  | 0.78 (0.54 - 1.13) | 0.1850  |
| REFINED GRAINS          | 1.16 (0.93 - 1.45) | 0.1930  | 0.73 (0.57 - 0.94) | 0.2580  | 0.73 (0.57 - 0.94) | 0.0150  | 1.10 (0.94 - 1.29) | 0.2200  |
| WHOLE GRAINS            | 0.62 (0.37 - 1.07) | 0.0850  | 0.96 (0.73 - 1.25) | 0.6300  | 0.96 (0.73 - 1.25) | 0.7430  | 0.94 (0.71 - 1.23) | 0.6290  |
| SWEETS                  | 1.15 (0.99 - 1.33) | 0.0610  | 0.99 (0.85 - 1.14) | 0.7840  | 0.99 (0.85 - 1.14) | 0.8770  | 0.97 (0.86 - 1.08) | 0.5550  |
| JAM, MARMALADE          | 0.56 (0.23 - 1.37) | 0.2060  | 1.01 (0.59 - 1.71) | 0.1690  | 1.01 (0.59 - 1.71) | 0.9840  | 0.85 (0.57 - 1.28) | 0.4360  |
| NON-ALCOHOLIC BEVERAGES | 1.12 (0.74 - 1.7)  | 0.5980  | 1.45 (1.01 - 2.08) | 0.2880  | 1.45 (1.01 - 2.08) | 0.0460  | 0.91 (0.63 - 1.30) | 0.5890  |
| LIQUOR                  | 0.001 (0.0 - 12.7) | 0.1480  | 0.25 (0.0 - 27.1)  | 0.8010  | 0.25 (0.0 - 27.1)  | 0.5600  | 0.14 (0.0 - 9.71)  | 0.3610  |
| COFFEE and TEA          | 1.09 (0.91 - 1.30) | 0.3700  | 0.90 (0.76 - 1.05) | 0.4130  | 0.9 (0.76 - 1.05)  | 0.1840  | 1.03 (0.90 - 1.18) | 0.6690  |
| PLANT OIL               | 0.77 (0.60 - 0.98) | 0.0350  | 0.85 (0.66 - 1.10) | 0.8430  | 0.85 (0.66 - 1.10) | 0.2160  | 1.01 (0.85 - 1.21) | 0.9220  |
| OLIVE OIL               | 1.29 (0.96 - 1.75) | 0.0970  | 1.03 (0.78 - 1.35) | 0.5300  | 1.03 (0.78 - 1.35) | 0.8470  | 1.00 (0.83 - 1.21) | 1.0000  |
| ANIMAL FAT              | 1.11 (0.50 - 2.45) | 0.8050  | 1.25 (0.73 - 2.14) | 0.1310  | 1.25 (0.73 - 2.14) | 0.4140  | 1.27 (0.87 - 1.86) | 0.2170  |

Statistically significant values (P<0.0031) are dark grey shaded, nominally significant values (0.01<P>0.0031) are light grey shaded. Symptom status (with/without symptom) was used as dependent variable and food groups as independent variables in logistic regression model. We also included age, gender, physical activity, BMI and TSH levels as covariates. OR - odds ration, CI - confidence interval
